# Supplementary material for: Visual detection of cobalt(ii) ion in vitro and tissue with a new type of leaf-like molecular microcrystal
Source: Royal Society of Chemistry journal article supplement (doi:10.1039/c0cc03205k), 2011-01-01
Supplement: c0cc03205k.pdf [file c0cc03205k.pdf]

## Electronic Supporting Information

*for*

### Visual Detection of Cobalt (II) Ion in Vitro and Tissue with a New Type of Leaf-Like Molecular Microcrystal

Shu Jun Zhen,<sup>a</sup> Feng Ling Guo,<sup>a</sup> Li Qiang Chen,<sup>c</sup> Yuan Fang Li,<sup>a</sup> Qing Zhang<sup>a</sup> and  
Cheng Zhi Huang<sup>\* a b</sup>

<sup>a</sup>Education Ministry Key Laboratory on Luminescence and Real-Time Analysis, College of Chemistry and Chemical Engineering, <sup>b</sup>College of Pharmaceutical Sciences, <sup>c</sup>College of Life Science, Southwest University, Chongqing 400715, PR China. E-mail: chengzhi@swu.edu.cn; Fax/Tel: (+86) 23 68254659.

#### Experimental Details

**Reagents and materials.** All reagents were of analytical grade and used without further purification. PVP, with a molecular weight of 55000, was purchased from Sigma. *p*-Phenylenediamine (*p*-PDA) monomer was gotten from Sinopharm Group Chemical Regent Co, Ltd. (Shanghai, China). 0.1 g/mL PVP working solution and 0.3 g/mL *p*-PDA working solution were prepared respectively by directly dissolving in doubly distilled water under vigorous magnetic stirring, and homogeneous solution at room temperature was available as a consequence.

0.1 M stock solution of AgNO<sub>3</sub> was prepared by dissolving solid AgNO<sub>3</sub> in doubly distilled water and the working solution was obtained by diluting the stock solution to 0.01 M with water. Doubly deionized water (18.2 MΩ) was used throughout the experiment and all glasswares were cleaned using concentrated nitric acid and subsequently rinsed with a copious amount of doubly deionized water.

**Apparatus.** Scanning electron microscopy (SEM) was applied to investigate the size and morphology of the newly prepared leaf-like PpPD microcrystals, and was carried out with a Hitachi (Tokyo, Japan) S-4800 scanning electron microscope at an accelerating voltage of 20 kV. FTIR spectra were measured on a Perkin Elmer Spectrum GX Fourier Transform Infrared (FTIR) Spectrometer (MA,USA) from 4000 to 500 cm<sup>-1</sup> at room temperature. X-ray photoelectron spectroscopy (XPS) analysis

was carried out on an ESCRLRB250X (America) cispectrometer with a standard Al K source (1486.6 eV) and X-ray powder diffraction (XRD) was measured on XD-3 system (Beijing Purkinje General Instrument Co. Ltd.) with Cu K $\alpha$  (1.5405 Å) radiation source under the operating voltage and current of 40 kV and 50 mA, respectively. UV-vis spectra were recorded on a Hitachi UV-3010 spectrophotometer at room temperature.

**Preparation of PpPD microcrystals.** The preparation of PpPD microcrystals was very easy to do by using AgNO<sub>3</sub> as an oxidant and poly (-N-vinylpyrrolidone) (PVP) as a surfactant at room temperature. First, 1 mL of 0.1 g/mL PVP solution and 6 mL of 0.3 g/mL *p*-PDA solution were mixed with 2 mL doubly deionized water in a 50 mL conical flask, and the 1108  $\mu$ L of 10mM AgNO<sub>3</sub> was injected under shaking table running at room temperature for 3 hours. Then, the products were centrifuged and washed 3 times with double-distilled water and absolute ethanol. After that, the PpPD microcrystals was suspended in distilled water, and transferred for the characterizations of SEM, FTIR or for the use of visual detection of Co<sup>2+</sup> and imaging in tissue.

**Experimental procedure.** To a 1.5 mL tube, solutions were added in the sequence of above-prepared 50  $\mu$ L 0.35g/L PpPD microcrystals solution and 50  $\mu$ L pH 6.12 Michaelis buffer. The mixture was vortexed and then an appropriate volume of water was added to make the initial volume of 500  $\mu$ L. At last, sample solution of Co<sup>2+</sup> was added and the mixture was got mixed thoroughly. After keeping still for 5 min, the mixture was transferred to UV measurements.

**Histopathology imaging and analysis.** Fish tissues including foregut and anus were fixed separately by immersion in 10% buffered formalin for 24 h, washed twice in phosphate buffered saline and transferred to 75% ethanol until processing. After dehydration and embedding in paraffin, tissues were step-sectioned to obtain longitudinal sections. Sections were pretreated by adding CoCl<sub>2</sub> solution and pure double-distilled water respectively for 12 h, and then incubated with PpPD microcrystals for 2 h. At last, the fish tissue was washed several times with

double-distilled water. Histopathological observation of tissues was carried out with an Olympus BX-51 microscope (Tokyo, Japan), which was equipped with a highly numerical dark field condenser (U-DCW) and an Olympus DP72 digital camera (Tokyo, Japan). The analyst was blinded to sample identification and no less than triplex samples from each tissue were analyzed.

## Figures

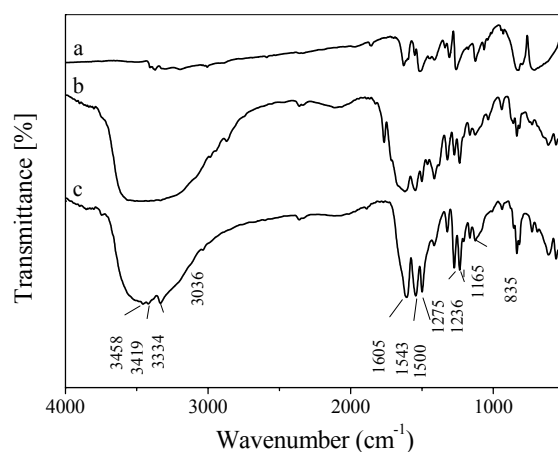

**Fig. S1** (a) FTIR spectra of pure *p*-PDA. (b) The FTIR spectra after the PpPD microparticles interacted with Co<sup>2+</sup>.  $c_{PpPD}$ , 0.035 g/L;  $c_{Co^{2+}}$ , 0.05 mM. (c) FTIR spectra of the PpPD microparticles.  $c_{PVP}$ , 0.01 g/mL;  $c_{p-PDA}$ , 0.03 g/mL;  $c_{AgNO_3}$ , 1.1 mM.

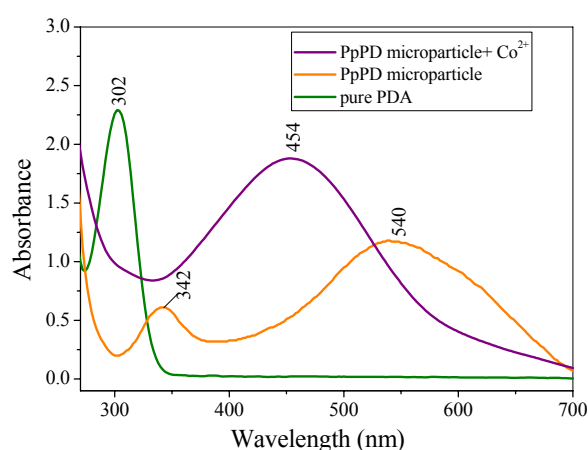

**Fig. S2** The UV-vis spectra of pure *p*-PDA, the PpPD microparticle synthesized and the PpPD microparticle interacted with Co<sup>2+</sup>, respectively. Curve 1 (green): Pure *p*-PDA; Curve 2 (purple): PpPD microparticles after interacted with Co<sup>2+</sup>.  $c_{PpPD}$ , 0.035

g/L;  $c_{\text{Co}^{2+}}$ , 0.05 mM. Curve 3 (yellow): PpPD microparticles.  $c_{\text{PVP}}$ , 0.01 g/ mL;  $c_{\text{P-PDA}}$ , 0.03 g / mL,  $c_{\text{AgNO}_3}$ , 1.10 mM.

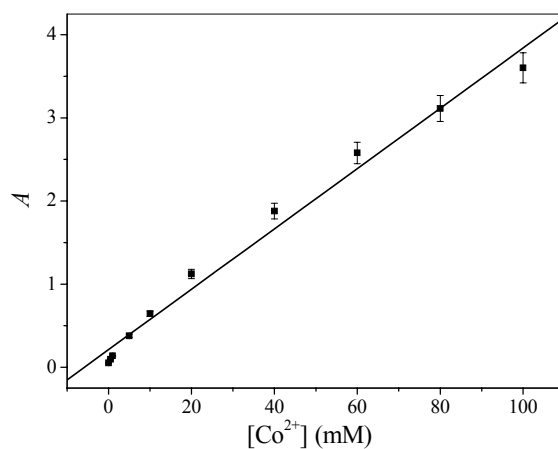

**Fig. S3** Linear response of the absorbance of the PpPD microcrystals with the addition of  $\text{Co}^{2+}$  (0.5-100  $\mu\text{M}$ ). The linear regression equation is  $A = 0.193 + 0.036 c$  with the corresponding correlation coefficient ( $r$ ) of 0.9930.  $c_{\text{PpPD}}$ , 0.035 g/L; pH 6.12;  $\lambda$ , 454 nm.

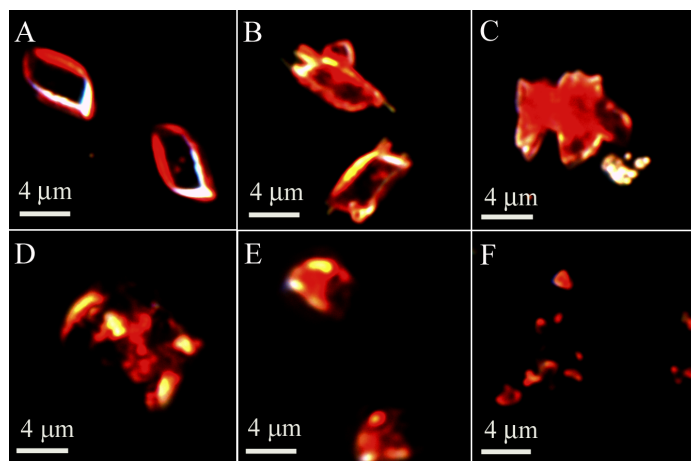

**Fig. S4** Etching effect of  $\text{Co}^{2+}$  on the PpPD microcrystals as displayed by dark-field light scattering images.  $c_{\text{Co}^{2+}}$ , (A) 0.0 (B) 1.0 (C) 10.0 (D) 40.0 (E) 80.0 (F) 100.0  $\mu\text{M}$ ;  $c_{\text{PpPD}}$ , 0.035 g/L. pH 6.12.

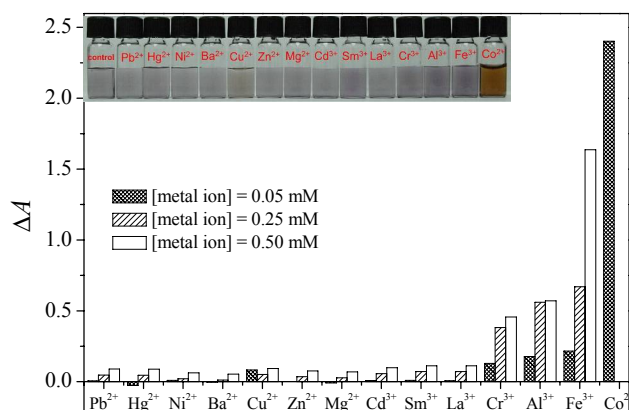

**Fig. S5** The absorbance change upon the addition of different metal ions.  $c_{PpPD}$ , 0.035 g/L; pH 6.12;  $\lambda$ , 454 nm. (The inset picture shows the color change of the PpPD microcrystals in presence of different metal ions with 0.05 mM concentration.)

**Table**

**Table S1.** FTIR peak Assignments in PpPD microcrystals

| Wave number, $\text{cm}^{-1}$ | Assignments                                                                        |
|-------------------------------|------------------------------------------------------------------------------------|
| 3458, 3419, 3334              | N–H stretching vibrations of the –NH– group,                                       |
| 3036                          | Aromatic C–H stretching vibration                                                  |
| 1605                          | C=N stretching vibrations in the phenazine ring                                    |
| 1543                          | C=C stretching vibrations in the phenazine ring                                    |
| 1500                          | Stretching of the benzene ring                                                     |
| 1275                          | C–N stretching in the benzenoid                                                    |
| 1236                          | C–N stretching in the quinoid imine units (–C=N–)                                  |
| 1165, 1006                    | Aromatic C–H in plane bending mode                                                 |
| 835                           | C–H out-of-plane bending vibrations of benzene nuclei<br>in the phenazine skeleton |
